# Supplementary material for: Interannual variability in the summer dissolved organic matter inventory of the North Sea: implications for the continental shelf pump
Source: Copernicus journal article supplement (doi:10.5194/bg-16-1073-2019), 2019-03-18
Supplement: Supplementary file 1 [file Chaichana et al Supplementary material resubmitted.pdf › Chaichana et al Supplementary material resubmitted.pdf]

# Supplementary material to *Interannual variability in the summer dissolved organic matter inventory of the North Sea* by Chaichana et al.

## 1. Synthesis of river and open ocean DOC/N end members applicable to the North Sea.

**Table S1.** Summary of riverine DOM concentrations and stoichiometry for North Sea and Baltic sources. References: 1. Harrison et al 2005; 2. Neal and Robson (2000); 3. Markager et al (2011); 4. Berman and Bronk, (2003). C:N values are calculated from DOC/DON concentrations unless quoted directly by the cited study.

| Location                | DOC ( $\mu\text{M}$ ) | DON ( $\mu\text{M}$ ) | C:N ratio | Reference |
|-------------------------|-----------------------|-----------------------|-----------|-----------|
| Danube                  | 458                   | 43                    | 11        | 1         |
| Elbe                    | 333                   | 65                    | 5         | 1         |
| Rhine                   | 450                   |                       |           | 1         |
| Scheldt                 | 658                   |                       |           | 1         |
| Seine                   | 308                   | 36                    | 8.6       | 1         |
| Wear                    | 360                   |                       |           | 2         |
| Derwent                 | 347                   |                       |           | 2         |
| Trent                   | 502                   |                       |           | 2         |
| Ouse                    | 476                   |                       |           | 2         |
| Thames                  | 369                   |                       |           | 2         |
| Horsen's Fjord (Baltic) | 591                   | 84                    | 11        | 3         |
| Baltic rivers           |                       | 30                    |           | 4         |
| Summary                 |                       |                       |           |           |
| mean                    | 440                   | 52                    | 8.8       |           |
| min                     | 308                   | 30                    | 5.1       |           |
| max                     | 658                   | 84                    | 11        |           |

**Table S2.** Summary of North Atlantic DOM concentrations and stoichiometry. C:N values are calculated from DOC/DON concentrations unless quoted directly by the cited study.

| Location                               | DOC / M | DON / M | C:N ratio | Reference                    |
|----------------------------------------|---------|---------|-----------|------------------------------|
| Bay of Biscay (offshore)               |         |         |           | Aminot and Kerouel (2004)    |
| 0-200m                                 | 61      | 4.4     | 14        |                              |
| 200-600m                               | 52      | 3.7     | 14        |                              |
| 800-1500m                              | 46      | 3.1     | 15        |                              |
| 3000-4000m                             | 42      | 2.7     | 16        |                              |
| Mid Atlantic<br>(60 to 35 North)       |         |         |           | Kahler and Koeve (2001)      |
| Surface                                | 60      | 6       | 10        |                              |
| >1000m (35 North)                      | 44      | 6.6     | 6.7       |                              |
| Faroe-Shetland Channel                 |         |         |           | Kramer et al., (2005)        |
| 0 - 400m                               | 61      | 7.5     | 8.9       |                              |
| 400 – 800m                             | 55.3    | 8.9     | 5.9       |                              |
| >800 m                                 | 53      | 7.7     | 9.1       |                              |
| North Atlantic (Greenland to Portugal) |         |         |           | Alvarez-Salgado et al (2013) |
| Surface waters                         | 54      | 4.5     | 13        |                              |
| Deep waters                            | 45      | 3.2     | 15        |                              |
| Summary                                |         |         |           |                              |
| Intermediate                           |         |         |           |                              |
| mean                                   | 58      | 5.6     | 11        |                              |
| min                                    | 52      | 3.7     | 5.9       |                              |
| max                                    | 61      | 8.9     | 14        |                              |
| Deep                                   |         |         |           |                              |
| mean                                   | 44      | 5.3     | 12        |                              |
| min                                    | 42      | 2.7     | 6.7       |                              |
| max                                    | 53      | 7.7     | 16        |                              |

## 2. Additional figures

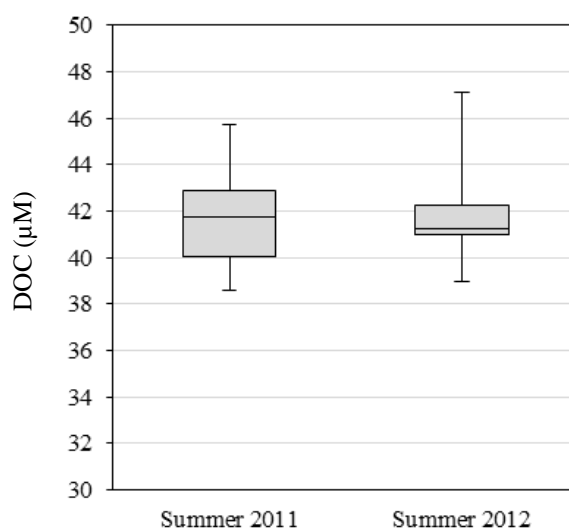

**Figure S1. Box-whisker plot of DOC concentrations ( $\mu\text{M}$ ) for deep seawater reference water (DSR) between the analyses for summer 2011 and summer 2012 samples. In each data set, the box indicates the lower (Q1, 25%) to the upper (Q3, 75%) quartile and the median (the horizontal line within the box). The lowest and highest data points indicate by the whiskers.**

## References

- Álvarez-Salgado, X. A., Nieto-Cid, M., Álvarez, M., Pérez, F. F., Morin, P. and Mercier, H.: New insights on the mineralization of dissolved organic matter in central, intermediate, and deep water masses of the northeast North Atlantic, *Limnol. Oceanogr.*, 58(2), 681–696, doi:10.4319/lo.2013.58.2.0681, 2013.
- Aminot, A. and Kérouel, R.: Dissolved organic carbon, nitrogen and phosphorus in the N-E Atlantic and the N-W Mediterranean with particular reference to non-refractory fractions and degradation, *Deep Sea Res. I*, 51(12), 1975–1999, doi:10.1016/j.dsr.2004.07.016, 2004.
- Berman, T. and Bronk, D.A.: Dissolved organic nitrogen: a dynamic participant in aquatic ecosystems, *Aquat. Microb. Ecol.*, 31, 279–305, 2003.
- Harrison, J.A., Caraco, N. and Seitzinger, S.P.: Global patterns and sources of dissolved organic matter export to the coastal zone: Results from a spatially explicit, global model, *Global Biogeochem. Cy.* 19, GB4SO4, doi:10.1029/2005GB002480, 2005.
- Kähler, P. and Koeve, W.: Marine dissolved organic matter: can its C:N ratio explain carbon overconsumption?, *Deep. Res. I*, 48(1), 49–62, doi:10.1016/S0967-0637(00)00034-0, 2001.
- Kramer, G. D., Pausz, C. and Herndl, G. J.: Elemental composition of dissolved organic matter and bacterioplankton production in the Faroe-Shetland Channel (North Atlantic), *Deep. Res. Part I Oceanogr. Res. Pap.*, 52(1), 85–97, doi:10.1016/j.dsr.2004.09.002, 2005.
- Markager, S., Stedmon, C. A. and Søndergaard, M.: Seasonal dynamics and conservative mixing of dissolved organic matter in the temperate eutrophic estuary Horsens Fjord, *Estuar. Coast. Shelf Sci.*, 92(3), 376–388, doi:10.1016/j.ecss.2011.01.014, 2011.
- Neal, C. and Robson, A.J.: A summary of river water quality data collected within the Land-Ocean Interaction Study: core data for eastern rivers draining to the North Sea, *Science of the Total Environment*, 251–252, 585–665, doi: 10.1016/S0048-9697(00)00397-1, 2000.
