# Supplementary material for: Interannual variability in the summer dissolved organic matter inventory of the North Sea: implications for the continental shelf pump
Source: Copernicus journal article supplement (doi:10.5194/bg-16-1073-2019), 2019-03-18
Supplement: Supplementary file [file bg-16-1073-2019-supplement-title-page.pdf › bg-16-1073-2019-supplement-title-page.pdf]

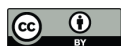

## *Supplement of*

# **Interannual variability in the summer dissolved organic matter inventory of the North Sea: implications for the continental shelf pump**

Saisiri Chaichana et al.

*Correspondence to:* Martin Johnson ([martin.johnson@uea.ac.uk](mailto:martin.johnson@uea.ac.uk))

- [bg-16-1073-2019-supplement-title-page.pdf](#)
- [Chaichana et al Supplementary material resubmitted.pdf](#)
- [Chaichana et al dataset.csv](#)

The copyright of individual parts of the supplement might differ from the CC BY 4.0 License.
